# Supplementary material
Source: Springer Nature journal article supplement (https://www.springermedizin.de/resource/supplementary/12888_2011_974_MOESM4_ESM.pdf/9479432)

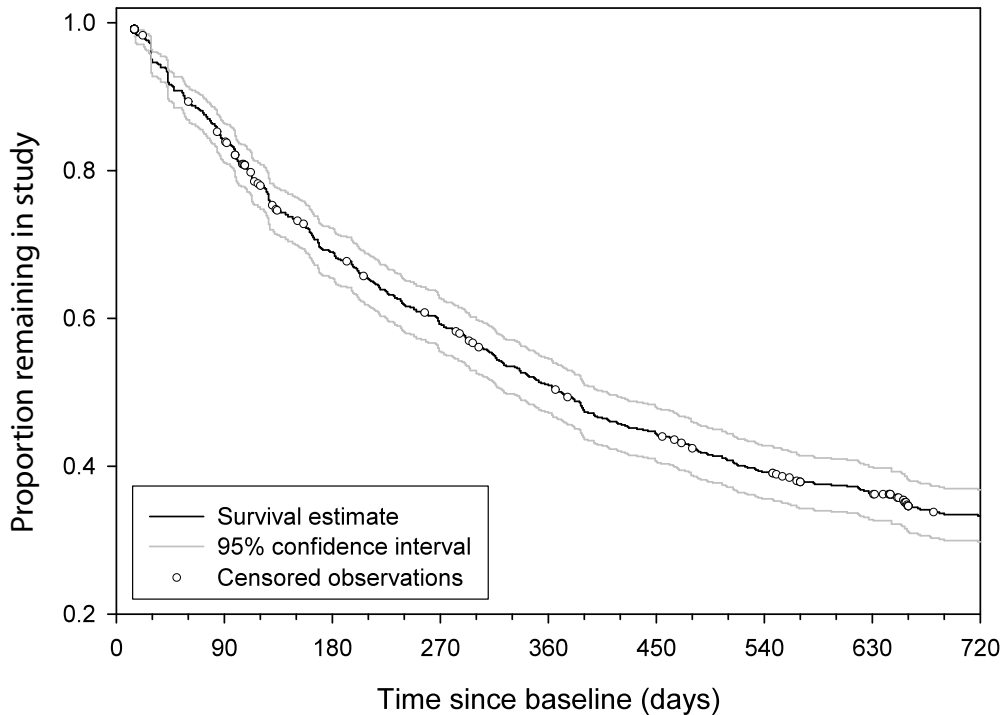

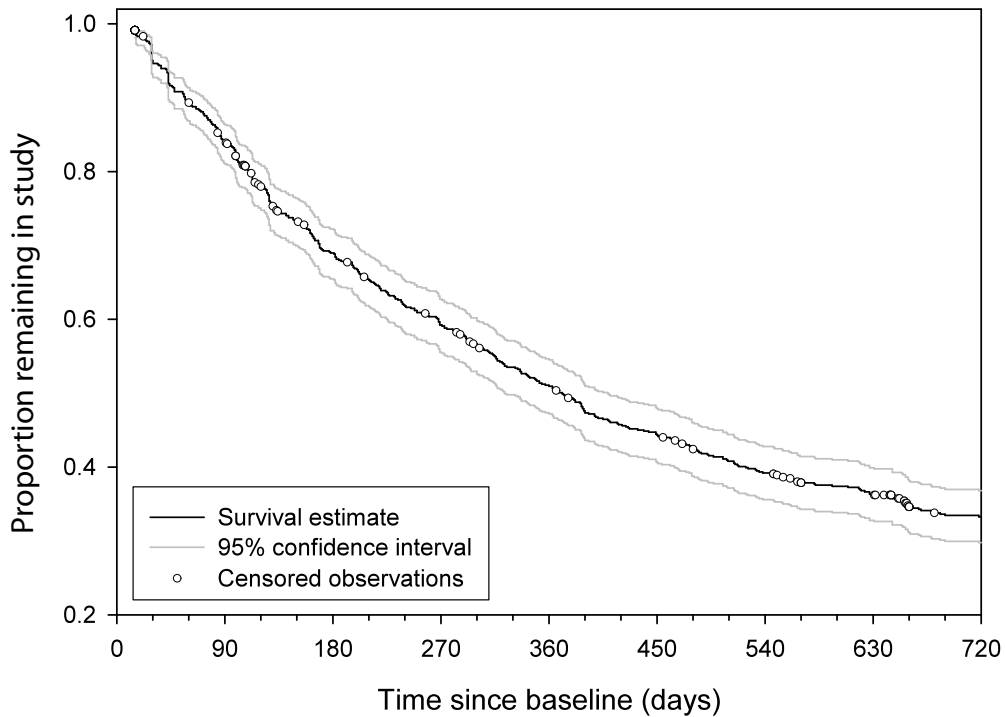











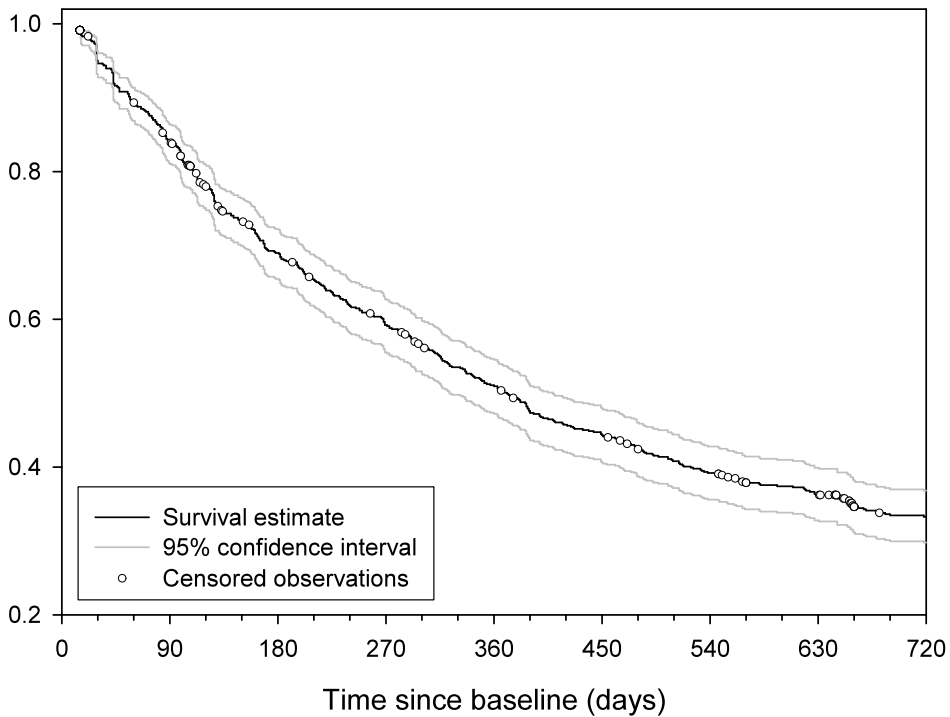





Supplement: MOESM4 [file 9479432]
